# Supplementary material
Source: publisher site journal article supplement (https://www.dovepress.com/article/321860)
Supplement: Supplementary file 1 [file get_supplementary_file.php]

|  |  |  |  |  | Both dives | | First dive | | Repetition dives | |
| --- | --- | --- | --- | --- | --- | --- | --- | --- | --- | --- |
| **Type** | **Variable** | **n** | **mean** | **sd** | **rs** | **p-value** | **rs** | **p-value** | **rs** | **p-value** |
| Post dive measure-ment | Heart Rate (/min) | 298 | 80 | 13.90 | -0.09 | 0.157 | -0.19* | 0.008 | 0.13 | 0.188 |
| BP Syst (mmHg) | 198 | 122 | 16.01 | -0.04 | 0.562 | -0.05 | 0.595 | 0.01 | 0.961 |
| BP Diast (mmHg) | 199 | 80 | 13.33 | -0.12 | 0.109 | -0.14 | 0.126 | 0.00 | 0.981 |
| dIVCmax (mm) | 260 | 20.0 | 5.02 | -0.07 | 0.272 | 0.01 | 0.942 | -0.14 | 0.200 |
| dIVCmin (mm) | 274 | 15.7 | 4.60 | -0.04 | 0.567 | -0.00 | 0.985 | -0.05 | 0.637 |
| dIVC min insp (mm) | 83 | 11.7 | 4.27 | 0.27* | 0.017 | 0.30* | 0.020 | -0.01 | 0.974 |
| IVCmin  Collapsibility Index | 255 | 21.4 | 10.45 | -0.05 | 0.460 | -0.08 | 0.351 | -0.12 | 0.283 |
| IVCminInsp Collapsibility Index | 65 | 40.8 | 21.97 | -0.28* | 0.027 | -0.31* | 0.044 | -0.13 | 0.598 |
| dAomax (mm) | 314 | 17.0 | 2.50 | -0.01 | 0.825 | 0.01 | 0.854 | 0.00 | 0.988 |
| dAomin (mm) | 302 | 15.0 | 2.31 | 0.13 | 0.0342 | 0.21 | 0.004 | 0.054 | 0.614 |
| dIVCmax / dAomin | 230 | 1.38 | 0.39 | -0.12 | 0.066 | -0.13 | 0.130 | -0.10 | 0.364 |
| dIVCmax / dAomax | 254 | 1.20 | 0.32 | -0.04 | 0.557 | 0.02 | 0.844 | -0.12 | 0.255 |
| dIVCmin / dA0min | 244 | 1.07 | 0.35 | -0.09 | 0.167 | -0.11 | 0.163 | -0.018 | 0.893 |
| dIVCmin (insp) / dAomin | 79 | 0.82 | 0.32 | 0.16 | 0.176 | 0.16 | 0.227 | 0.04 | 0.876 |
| dIVCmin / dAomax | 269 | 0.94 | 0.29 | -0.03 | 0.696 | -0.01 | 0.859 | -0.03 | 0.771 |
| Post-Pre dive differences | Heart Rate_diff | 294 | -3.09 | 13.41 | 0.09 | 0.133 | 0.02 | 0.750 | 0.15 | 0.147 |
| BP Syst_diff | 197 | -3.07 | 15.44 | -0.01 | 0.917 | 0.08 | 0.388 | -0.09 | 0.510 |
| BP Diast_ diff | 198 | 1.80 | 14.5 | -0.43 | 0.558 | -0.015 | 0.864 | -0.07 | 0.574 |
| dIVCmax_diff | 236 | -0.39 | 4.76 | -0.20* | 0.002 | -0.13 | 0.127 | -0.29* | 0.012 |
| dIVCmin_diff | 248 | -0.42 | 4.71 | -0.19* | 0.004 | -0.17* | 0.031 | -0.21 | 0.065 |
| dAomax_diff | 301 | -0.07 | 2.16 | 0.09 | 0.136 | 0.11 | 0.117 | 0.08 | 0.472 |
| dAomin_diff | 286 | 0.17 | 3.39 | 0.14* | 0.019 | 0.22* | 0.003 | 0.05 | 0.642 |
| dIVCmax / dAomin_diff | 204 | -0.03 | 0.45 | -0.34* | 0.000 | -0.32* | 0.000 | -0.38* | 0.001 |
| dIVCmax / dAomax_diff | 225 | -0.01 | 0.31 | -0.22* | 0.001 | -0.17* | 0.042 | -0.27* | 0.020 |
| dIVCmin / dAomin_diff | 215 | -0.06 | 0.41 | -0.30* | 0.000 | -0.31* | 0.000 | -0.22 | 0.063 |
| dIVCmin (insp) / dAomin_ diff | 19 | 0.081 | 0.332 | 0.31 | 0.198 | 0.35 | 0.201 | 0.40 | 0.750 |
| dIVCmin / dAomax_diff | 237 | -0.03 | 0.32 | -0.20* | 0.002 | -0.19* | 0.017 | -0.20 | 0.089 |

Table S1: All vital and ultrasound-derived parameters as post dive measurements and post-predive differences. Different measurement numbers of each parameter (n) are due to ultrasound scans that were excluded in post-hoc analysis for not optimal quality. Correlation coefficients with an uncorrected p-value lower than 0.05 are flagged with “*”.

| Model | Variable | Estimate (standardised) | Std. Error | Degrees of freedom | t value | p value |
| --- | --- | --- | --- | --- | --- | --- |
| A (post) | (Intercept) | 0.99 | 0.09 | 140.47 | 10.93 | 0.000 |
|  | IVC Collapsibility Index (post dive) | 0.00  (-0.02) | 0.00 | 222.77 | -0.25 | 0.813 |
|  | **Marginal R2 (Fixed effects) = 0.000**, Conditional R2 (Total) = 0.178, ICC = 0.25 | | | | | |
| B (post-pre) | (Intercept) | 1.02 | 0.05 | 20.10 | 22.04 | 0.000 |
|  | dIVCmax/dAomin_DIFF_post-pre | -0.35 (0.26) | -0.09 | 124.03 | -3.80 | **0.000** |
|  | **Marginal R2 (Fixed effects) = 0.074**, Conditional R2 (Total) = 0.175, ICC = 0.13 | | | | | |
| C (post-pre) | (Intercept) | 1.02 | 0.05 | 21.15 | 20.30 | 0.000 |
|  | dIVCmin/dAomin_DIFF_post-pre | -0.34  (-0.23) | 0.10 | 180.97 | -3.37 | **0.001** |
|  | **Marginal R2 (Fixed effects) = 0.054**, Conditional R2 (Total) = 0.173, ICC = 0.14 | | | | | |

Table S2: Mixed-Regression models for the effect of the relative weight loss (-% body weight) on sonographic vascular parameters. The Participant-ID was defined as a random effect (intercept), as there were multiple measurements per individual and the first or second dive was defined as a random slope, as it affected the relationship between the parameters. The marginal R2 described the percentage of variance explained by the vascular parameter and is therefore analogous to the classical R2, the conditional R2 describes the explained variance by the vascular parameter and the random effect (e.g. participant). ICC is the intra class coefficient describing the similarity of measurements within groups (e.g. participant).
