# Supplementary material
Source: publisher site journal article supplement (https://www.dovepress.com/article/321860)
Supplement: Supplementary file 2 [file get_supplementary_file.php]

Supplement:

Sonographic Estimation rather than Quantification of Fluid Status using Inferior Vena Cava and other major vessel parameters in a non-bleeding fluid loss and centralization model.

| Type                      | Variable                        | n     | mean  | sd     | Both dives     |         | First dive     |         | Repetition dives |         |
|---------------------------|---------------------------------|-------|-------|--------|----------------|---------|----------------|---------|------------------|---------|
|                           |                                 |       |       |        | r <sub>s</sub> | p-value | r <sub>s</sub> | p-value | r <sub>s</sub>   | p-value |
| Post dive measurement     | Heart Rate (/min)               | 298   | 80    | 13.90  | -0.09          | 0.157   | -0.19*         | 0.008   | 0.13             | 0.188   |
|                           | BP Syst (mmHg)                  | 198   | 122   | 16.01  | -0.04          | 0.562   | -0.05          | 0.595   | 0.01             | 0.961   |
|                           | BP Diast (mmHg)                 | 199   | 80    | 13.33  | -0.12          | 0.109   | -0.14          | 0.126   | 0.00             | 0.981   |
|                           | dIVCmax (mm)                    | 260   | 20.0  | 5.02   | -0.07          | 0.272   | 0.01           | 0.942   | -0.14            | 0.200   |
|                           | dIVCmin (mm)                    | 274   | 15.7  | 4.60   | -0.04          | 0.567   | -0.00          | 0.985   | -0.05            | 0.637   |
|                           | dIVC min insp (mm)              | 83    | 11.7  | 4.27   | 0.27*          | 0.017   | 0.30*          | 0.020   | -0.01            | 0.974   |
|                           | IVCmin Collapsibility Index     | 255   | 21.4  | 10.45  | -0.05          | 0.460   | -0.08          | 0.351   | -0.12            | 0.283   |
|                           | IVCminInsp Collapsibility Index | 65    | 40.8  | 21.97  | -0.28*         | 0.027   | -0.31*         | 0.044   | -0.13            | 0.598   |
|                           | dAomax (mm)                     | 314   | 17.0  | 2.50   | -0.01          | 0.825   | 0.01           | 0.854   | 0.00             | 0.988   |
|                           | dAomin (mm)                     | 302   | 15.0  | 2.31   | 0.13           | 0.0342  | 0.21           | 0.004   | 0.054            | 0.614   |
|                           | dIVCmax / dAomin                | 230   | 1.38  | 0.39   | -0.12          | 0.066   | -0.13          | 0.130   | -0.10            | 0.364   |
|                           | dIVCmax / dAomax                | 254   | 1.20  | 0.32   | -0.04          | 0.557   | 0.02           | 0.844   | -0.12            | 0.255   |
|                           | dIVCmin / dAomin                | 244   | 1.07  | 0.35   | -0.09          | 0.167   | -0.11          | 0.163   | -0.018           | 0.893   |
|                           | dIVCmin (insp) / dAomin         | 79    | 0.82  | 0.32   | 0.16           | 0.176   | 0.16           | 0.227   | 0.04             | 0.876   |
| dIVCmin / dAomax          | 269                             | 0.94  | 0.29  | -0.03  | 0.696          | -0.01   | 0.859          | -0.03   | 0.771            |         |
| Post-Pre dive differences | Heart Rate_diff                 | 294   | -3.09 | 13.41  | 0.09           | 0.133   | 0.02           | 0.750   | 0.15             | 0.147   |
|                           | BP Syst_diff                    | 197   | -3.07 | 15.44  | -0.01          | 0.917   | 0.08           | 0.388   | -0.09            | 0.510   |
|                           | BP Diast_diff                   | 198   | 1.80  | 14.5   | -0.43          | 0.558   | -0.015         | 0.864   | -0.07            | 0.574   |
|                           | dIVCmax_diff                    | 236   | -0.39 | 4.76   | -0.20*         | 0.002   | -0.13          | 0.127   | -0.29*           | 0.012   |
|                           | dIVCmin_diff                    | 248   | -0.42 | 4.71   | -0.19*         | 0.004   | -0.17*         | 0.031   | -0.21            | 0.065   |
|                           | dAomax_diff                     | 301   | -0.07 | 2.16   | 0.09           | 0.136   | 0.11           | 0.117   | 0.08             | 0.472   |
|                           | dAomin_diff                     | 286   | 0.17  | 3.39   | 0.14*          | 0.019   | 0.22*          | 0.003   | 0.05             | 0.642   |
|                           | dIVCmax / dAomin_diff           | 204   | -0.03 | 0.45   | -0.34*         | 0.000   | -0.32*         | 0.000   | -0.38*           | 0.001   |
|                           | dIVCmax / dAomax_diff           | 225   | -0.01 | 0.31   | -0.22*         | 0.001   | -0.17*         | 0.042   | -0.27*           | 0.020   |
|                           | dIVCmin / dAomin_diff           | 215   | -0.06 | 0.41   | -0.30*         | 0.000   | -0.31*         | 0.000   | -0.22            | 0.063   |
|                           | dIVCmin (insp) / dAomin_diff    | 19    | 0.081 | 0.332  | 0.31           | 0.198   | 0.35           | 0.201   | 0.40             | 0.750   |
| dIVCmin / dAomax_diff     | 237                             | -0.03 | 0.32  | -0.20* | 0.002          | -0.19*  | 0.017          | -0.20   | 0.089            |         |

Table S1: All vital and ultrasound-derived parameters as post dive measurements and post-pre dive differences. Different measurement numbers of each parameter (n) are due to ultrasound scans that were excluded in post-hoc analysis for not optimal quality. Correlation coefficients with an uncorrected p-value lower than 0.05 are flagged with “\*”.

Supplement:

Sonographic Estimation rather than Quantification of Fluid Status using Inferior Vena Cava and other major vessel parameters in a non-bleeding fluid loss and centralization model.

| Model                                                                                                          | Variable                             | Estimate (standardised) | Std. Error | Degrees of freedom | t value | p value      |
|----------------------------------------------------------------------------------------------------------------|--------------------------------------|-------------------------|------------|--------------------|---------|--------------|
| A (post)                                                                                                       | (Intercept)                          | 0.99                    | 0.09       | 140.47             | 10.93   | 0.000        |
|                                                                                                                | IVC Collapsibility Index (post dive) | 0.00 (-0.02)            | 0.00       | 222.77             | -0.25   | 0.813        |
| <b>Marginal R<sup>2</sup> (Fixed effects) = 0.000</b> , Conditional R <sup>2</sup> (Total) = 0.178, ICC = 0.25 |                                      |                         |            |                    |         |              |
| B (post-pre)                                                                                                   | (Intercept)                          | 1.02                    | 0.05       | 20.10              | 22.04   | 0.000        |
|                                                                                                                | dIVCmax/dAomin_DIFF_post-pre         | -0.35 (-0.26)           | -0.09      | 124.03             | -3.80   | <b>0.000</b> |
| <b>Marginal R<sup>2</sup> (Fixed effects) = 0.074</b> , Conditional R <sup>2</sup> (Total) = 0.175, ICC = 0.13 |                                      |                         |            |                    |         |              |
| C (post-pre)                                                                                                   | (Intercept)                          | 1.02                    | 0.05       | 21.15              | 20.30   | 0.000        |
|                                                                                                                | dIVCmin/dAomin_DIFF_post-pre         | -0.34 (-0.23)           | 0.10       | 180.97             | -3.37   | <b>0.001</b> |
| <b>Marginal R<sup>2</sup> (Fixed effects) = 0.054</b> , Conditional R <sup>2</sup> (Total) = 0.173, ICC = 0.14 |                                      |                         |            |                    |         |              |

Table S2: Mixed-Regression models for the effect of the relative weight loss (-% body weight) on sonographic vascular parameters. The Participant-ID was defined as a random effect (intercept), as there were multiple measurements per individual and the first or second dive was defined as a random slope, as it affected the relationship between the parameters. The marginal R<sup>2</sup> described the percentage of variance explained by the vascular parameter and is therefore analogous to the classical R<sup>2</sup>, the conditional R<sup>2</sup> describes the explained variance by the vascular parameter and the random effect (e.g. participant). ICC is the intra class coefficient describing the similarity of measurements within groups (e.g. participant).
